# Supplementary material
Source: publisher figshare collection journal article supplement (https://acs.figshare.com/ndownloader/files/10695589)

## Supplementary Materials

**Figure.S1** The Mean Square Displacement vs time curves for WGP (polysaccharide from wheat germ) (the first curves are in blue, then green, and lastly in red; A, B, C, D, E was the concentration of WGP at 0.1, 0.5, 1, 3, 5 mg/mL respectively ).

**A**

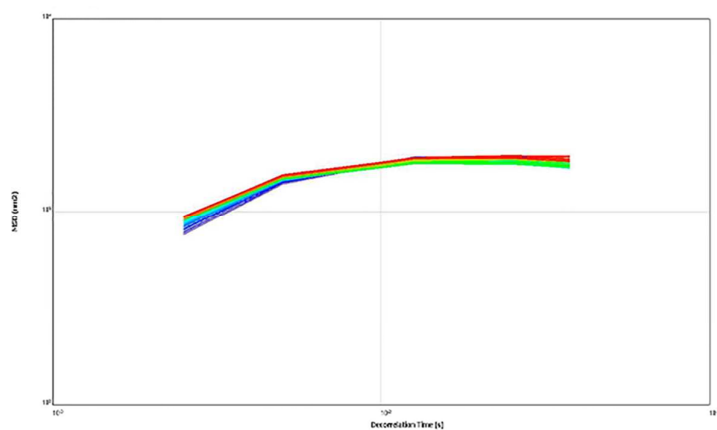

**B**

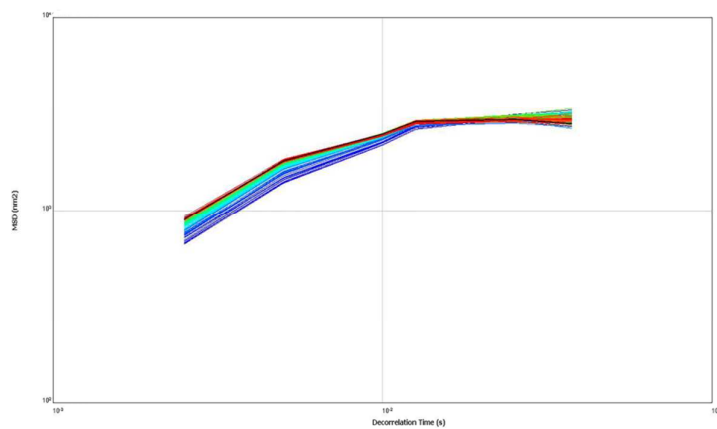

**C**

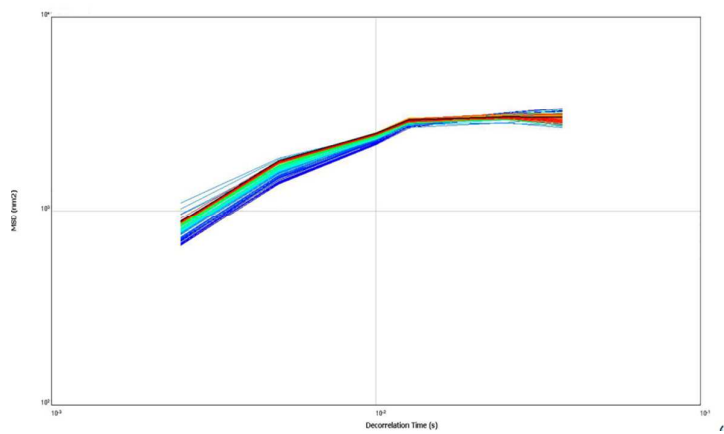

**D**

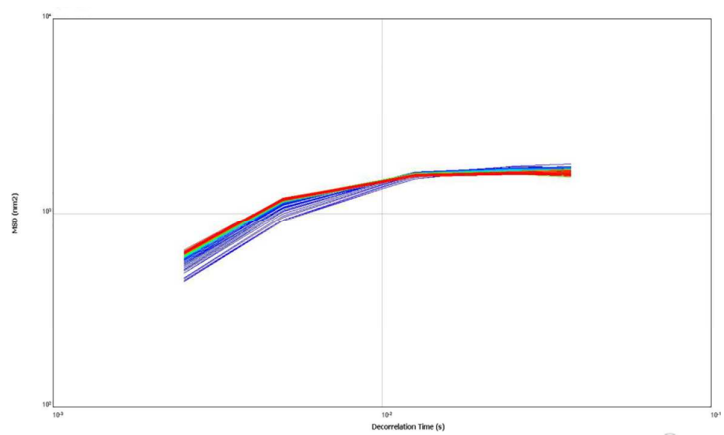

**E**

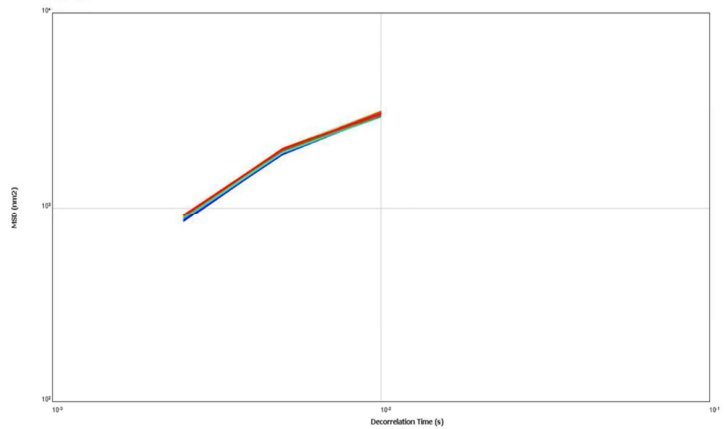

Supplement: Supplementary file 1 [file 10695589]
